# Supplementary material for: Synergistic and Independent Actions of Multiple Terminal Nucleotidyl Transferases in the 3’ Tailing of Small RNAs in Arabidopsis
Source: PubMed Central journal article supplement (PMC4415790; doi:10.1371/journal.pgen.1005091), 2015-04-30

S4 Figure

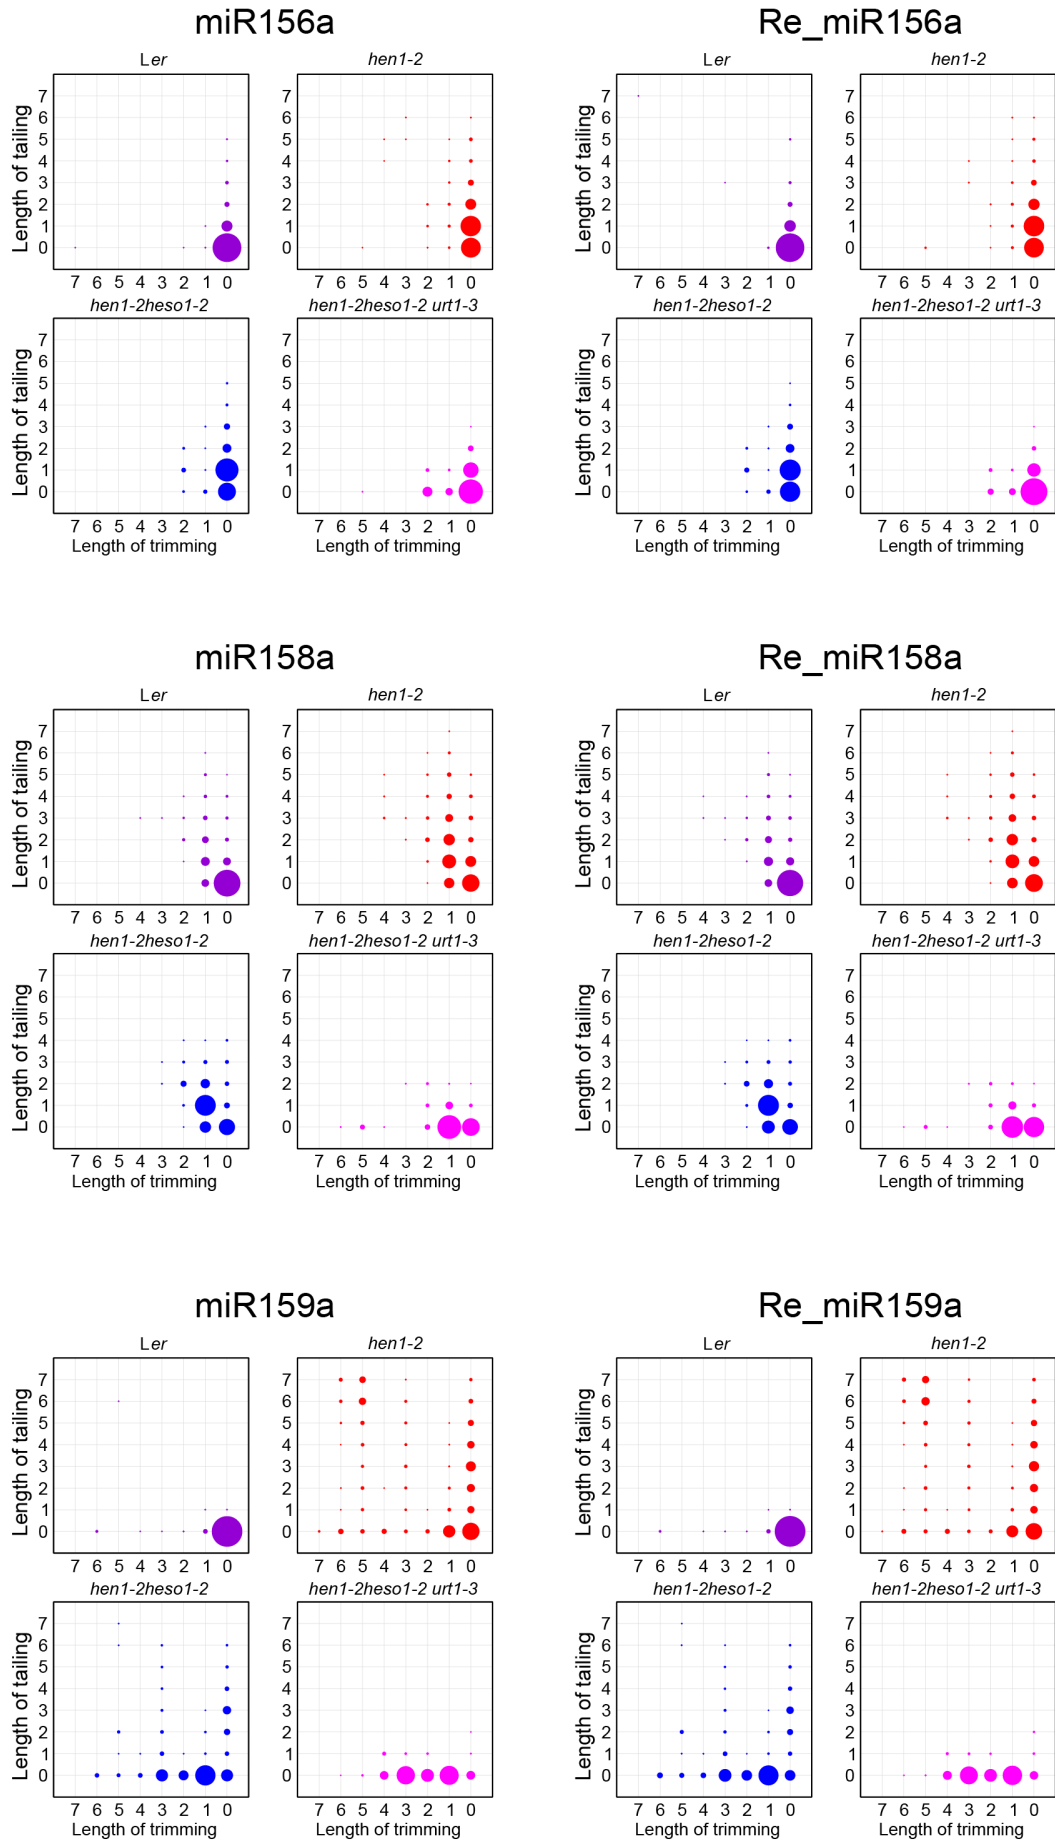

### miR160a

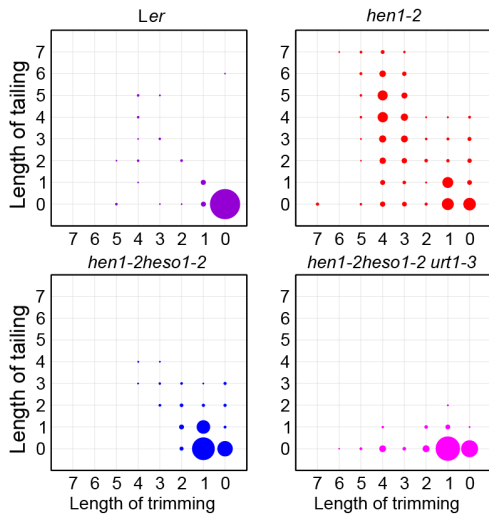

### Re\_miR160a

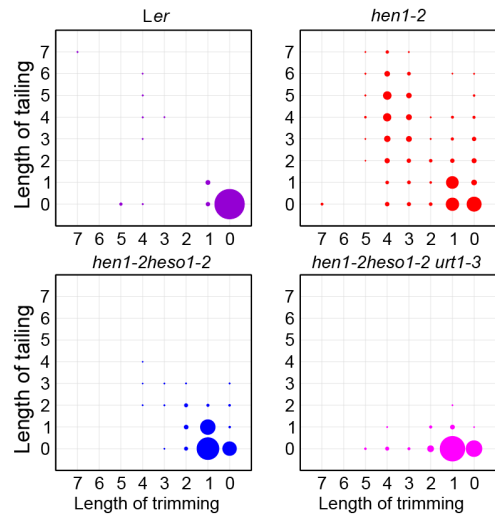

### miR162a

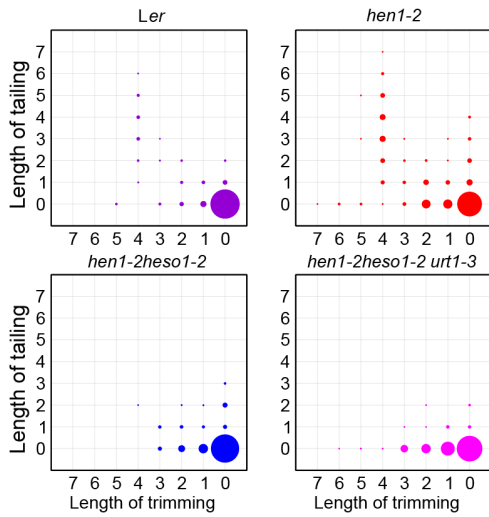

### Re\_miR162a

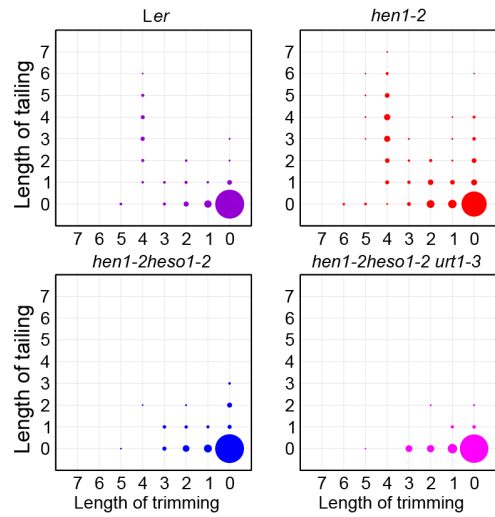

### Re\_miR163

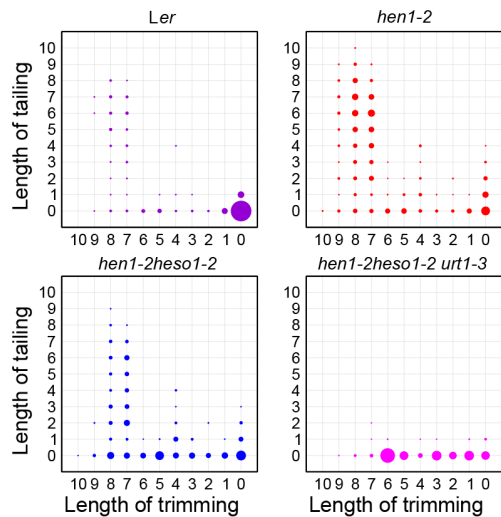

### miR164a

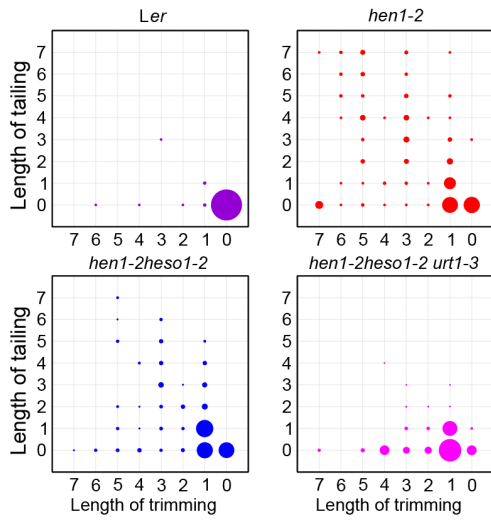

### Re\_miR164a

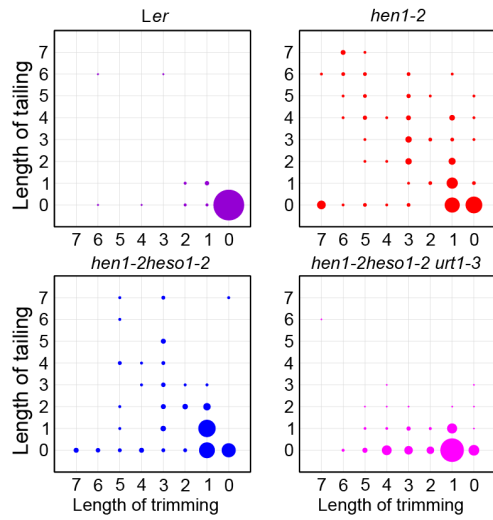

### miR166a

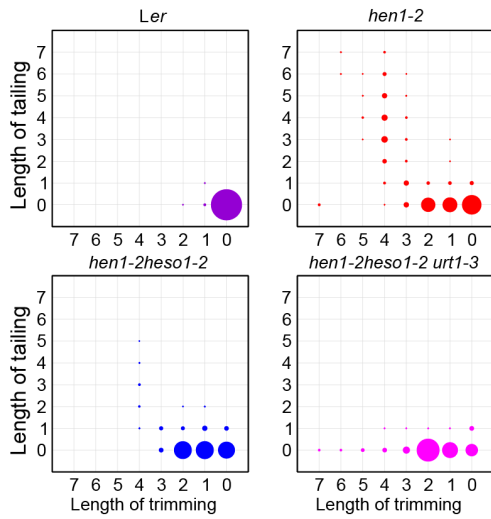

### Re\_miR166a

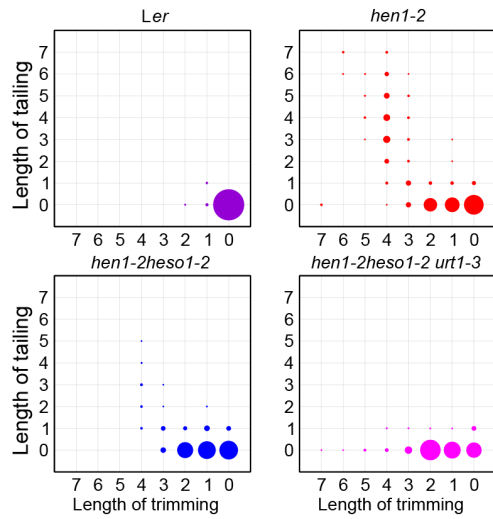

### miR167a

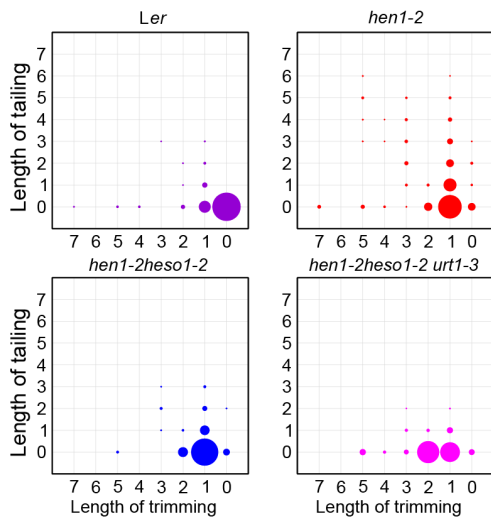

### Re\_miR167a

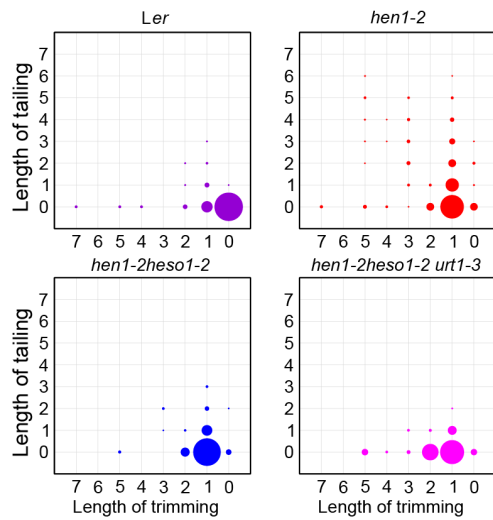

### miR168a

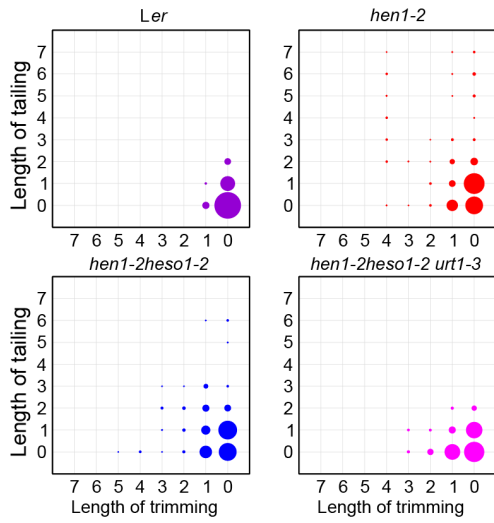

### Re\_miR168a

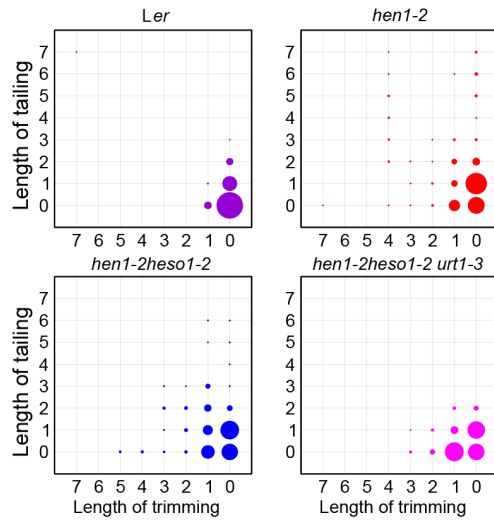

### miR171a

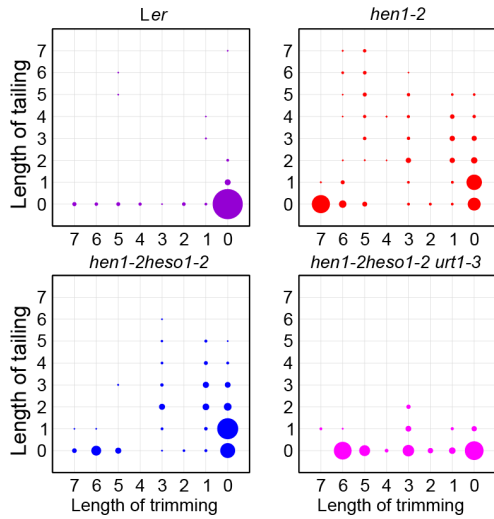

### Re\_miR171a

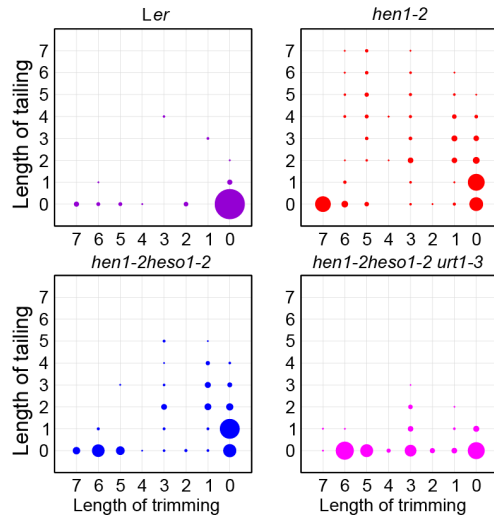

### Re\_miR172a

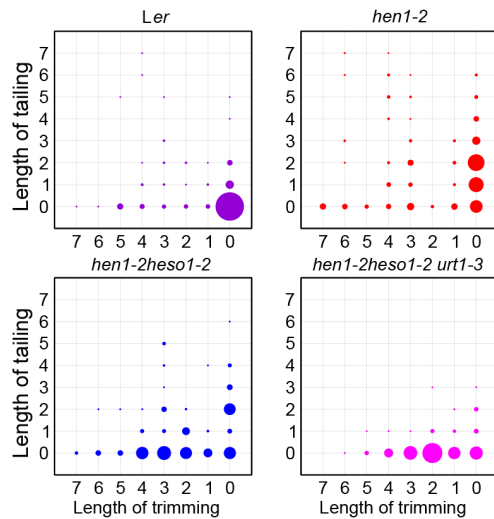

### miR173

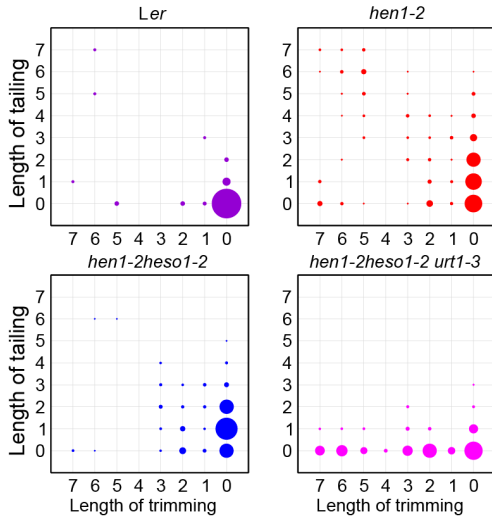

### Re\_miR173

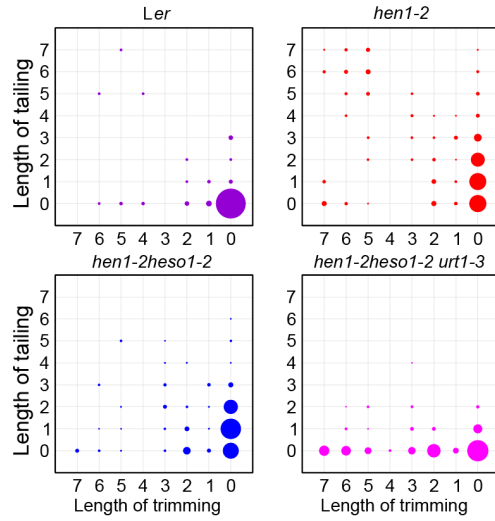

### miR319a

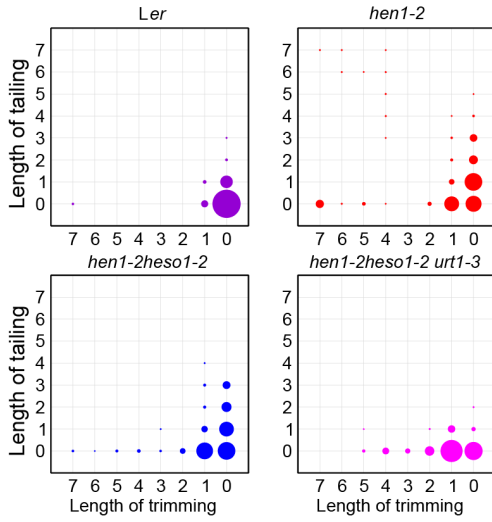

### Re\_miR319a

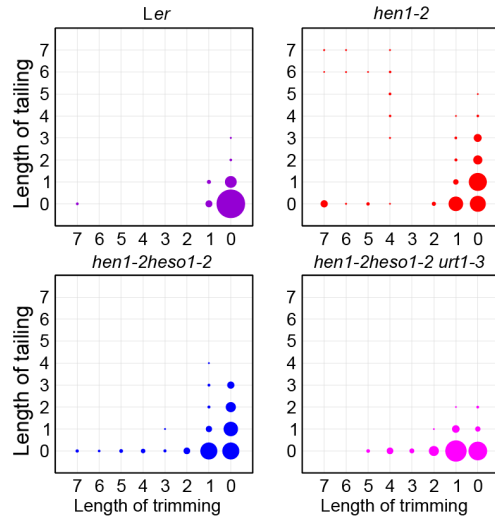

### miR390a

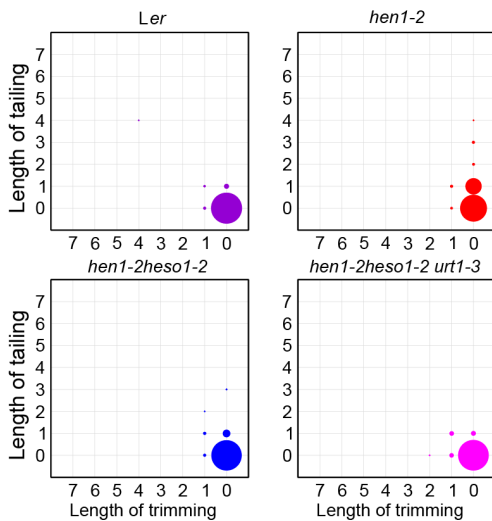

### Re\_miR390a

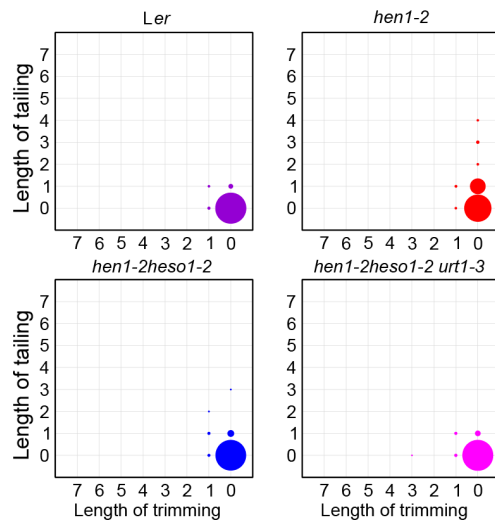



### miR846

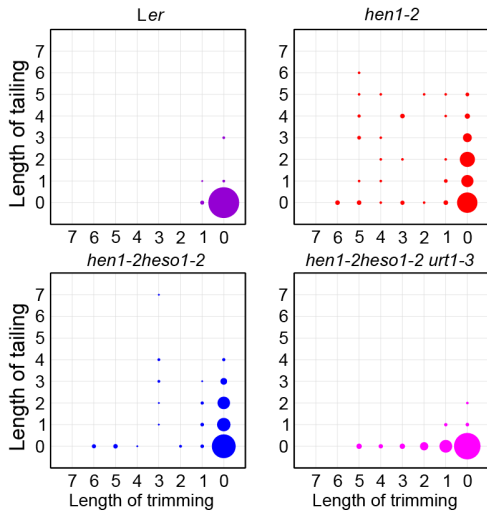

### Re\_miR846

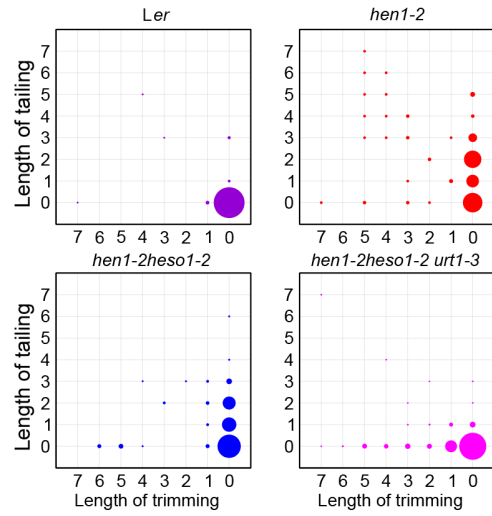

### TAS1c-2

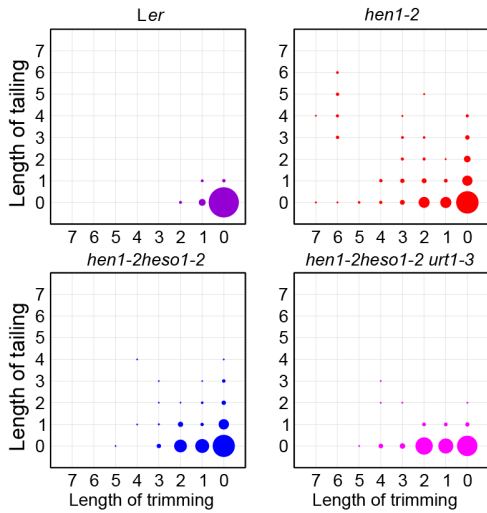

### Re\_TAS1c-2

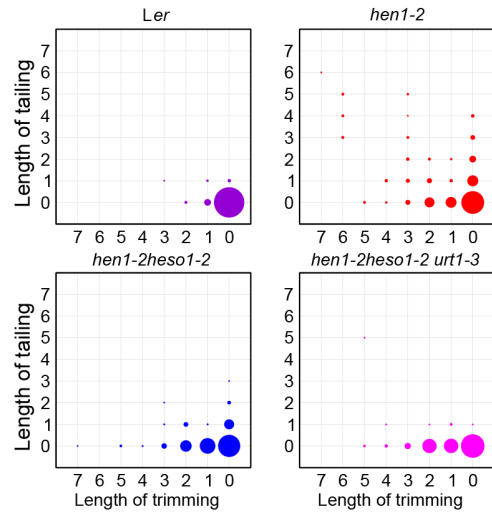

TAS1c-2: TCCAATGTCTTTTCTAGTTCGT

### atTAS1a-siR255

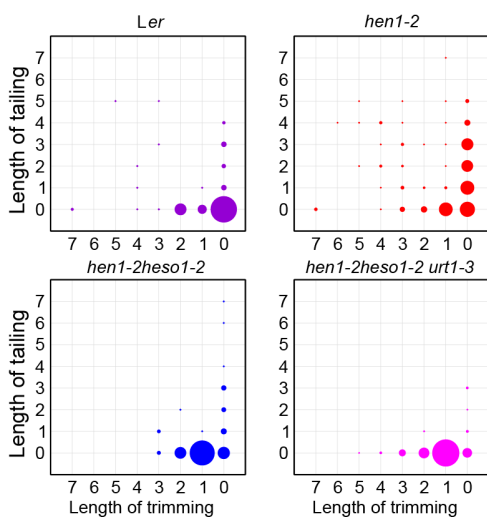

### Re\_atTAS1a-siR255

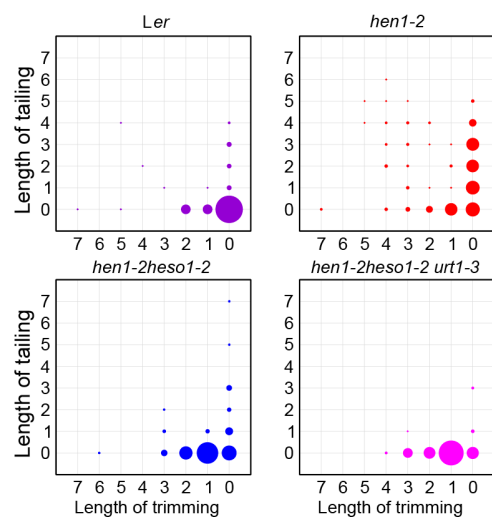

### Re\_siR-A

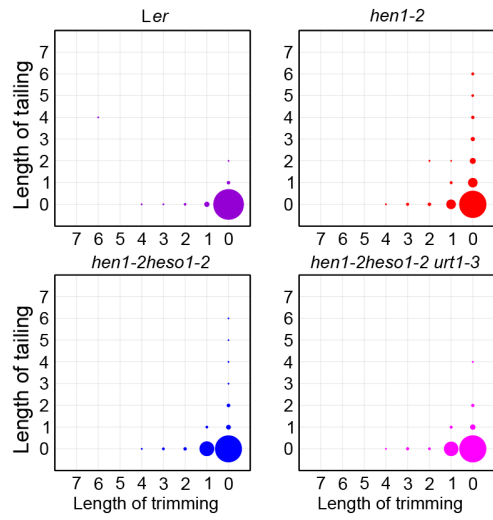

### siR-B

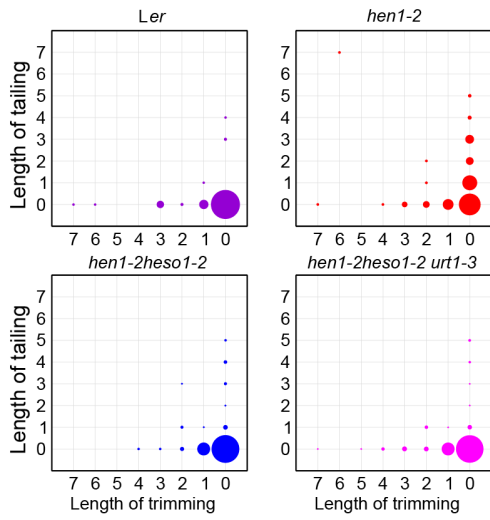

### Re\_siR-B

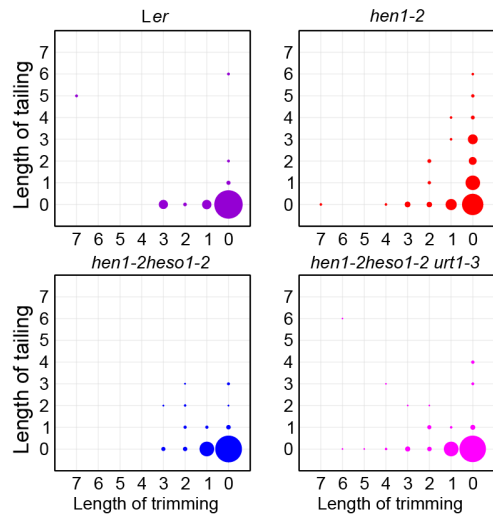

### siR-C

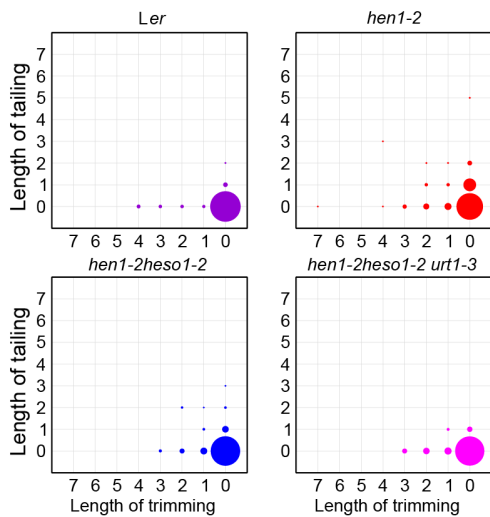

### Re\_siR-C

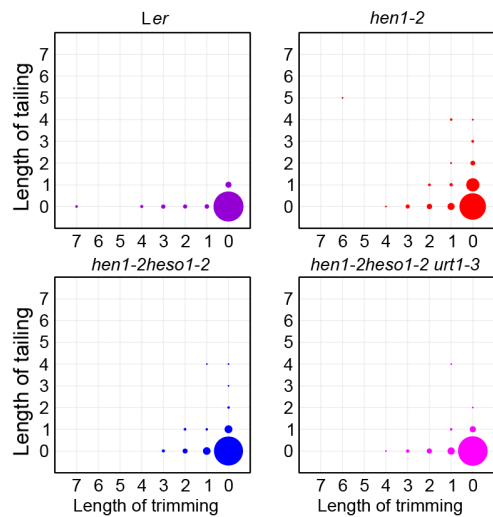

Supplement: pgen.1005091.s004.pdf [file pgen.1005091.s004.pdf]
