# Supplementary material for: Synergistic and Independent Actions of Multiple Terminal Nucleotidyl Transferases in the 3’ Tailing of Small RNAs in Arabidopsis
Source: PubMed Central journal article supplement (PMC4415790; doi:10.1371/journal.pgen.1005091), 2015-04-30

S2 Figure

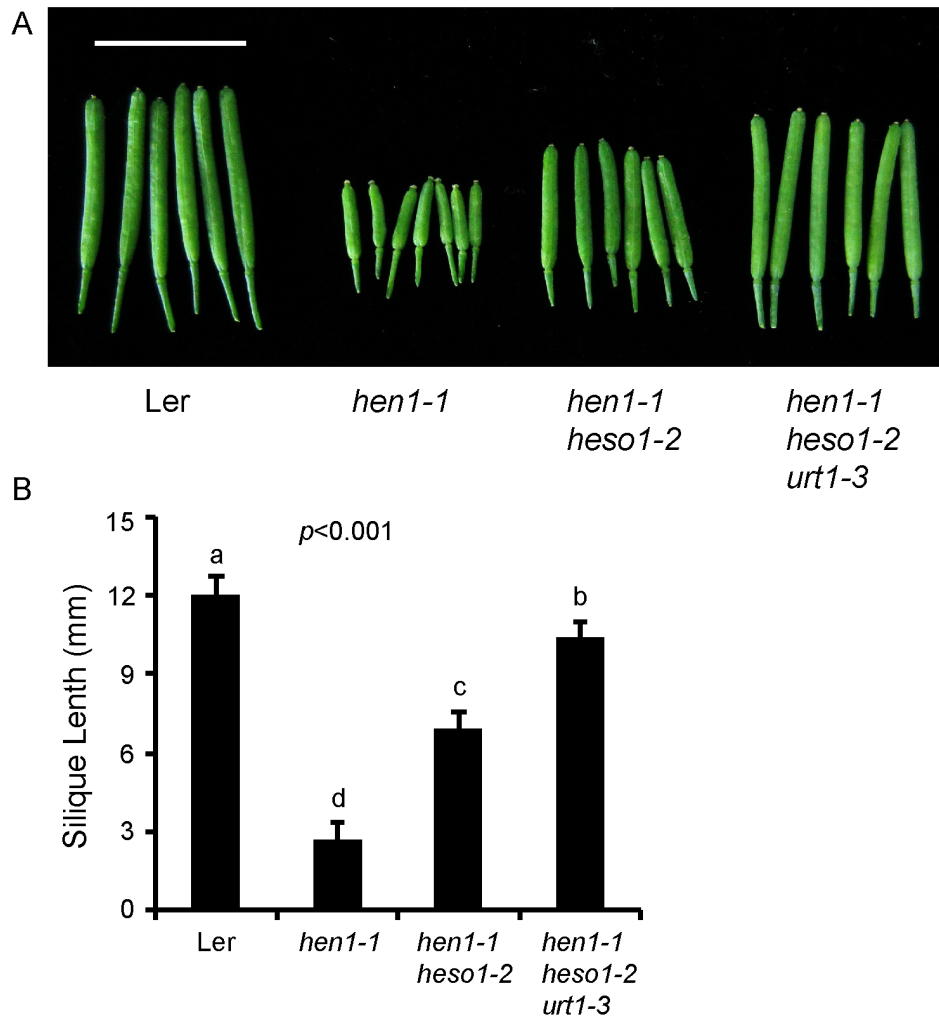

Supplement: pgen.1005091.s002.pdf [file pgen.1005091.s002.pdf]
