# Supplementary material for: Synergistic and Independent Actions of Multiple Terminal Nucleotidyl Transferases in the 3’ Tailing of Small RNAs in Arabidopsis
Source: PubMed Central journal article supplement (PMC4415790; doi:10.1371/journal.pgen.1005091), 2015-04-30

# S6 Figure

## A IP: @GFP, related to Figure 6E

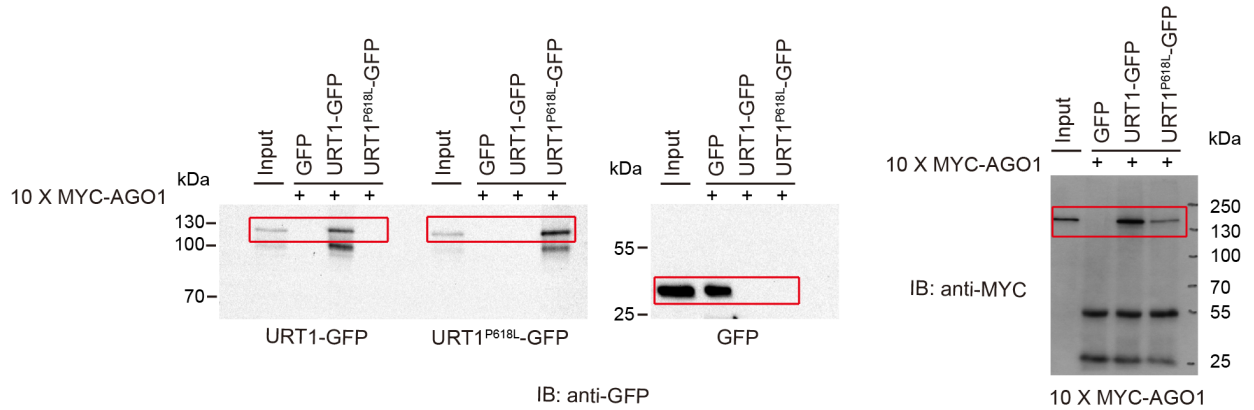

## B IP: @MYC, related to Figure 6F

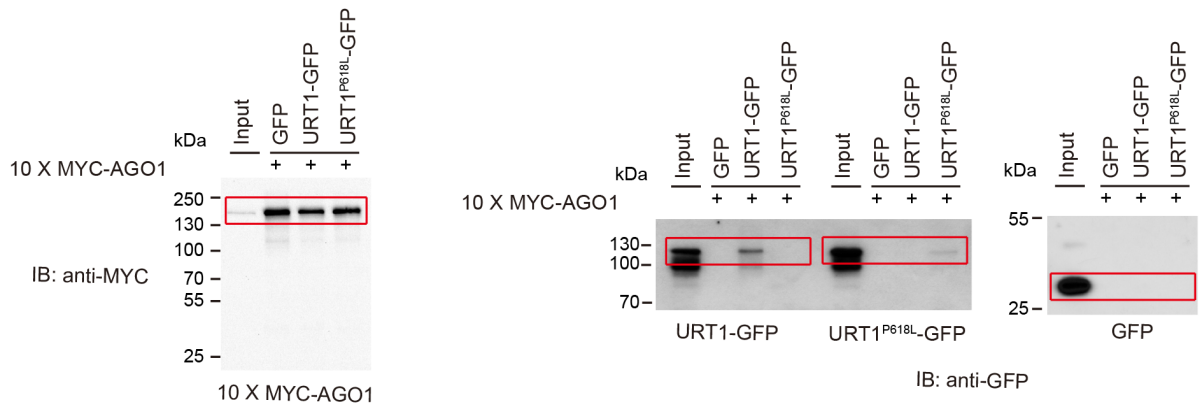

## C

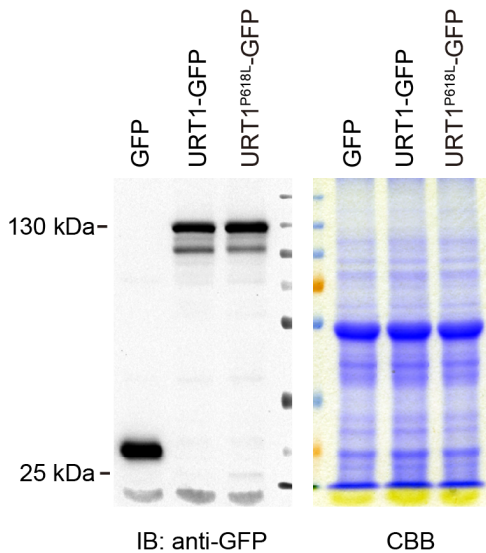

## D

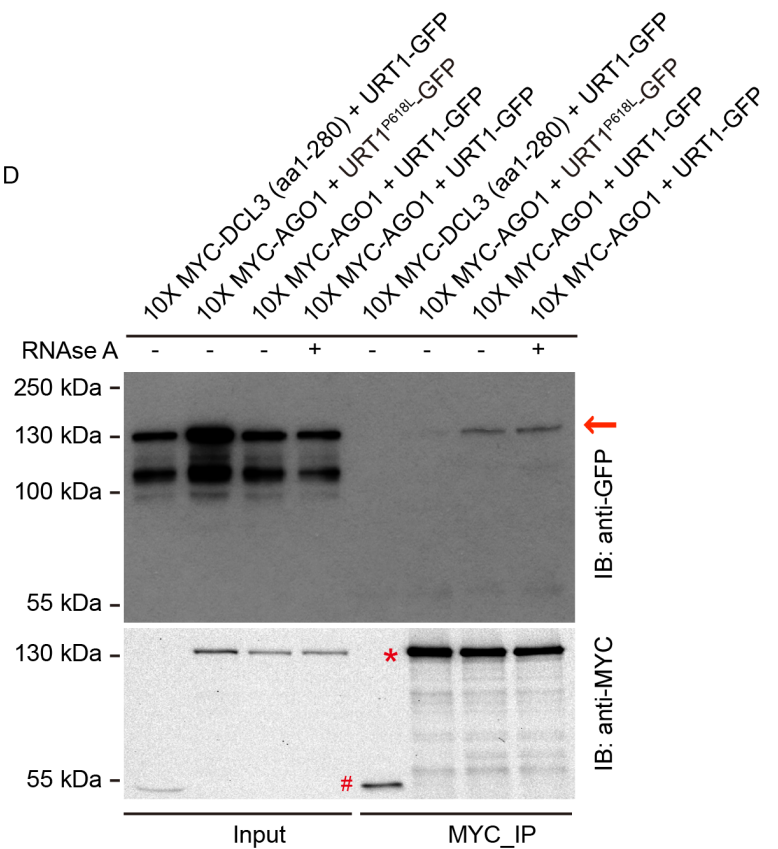

Supplement: pgen.1005091.s006.pdf [file pgen.1005091.s006.pdf]
