# Supplementary material for: Synergistic and Independent Actions of Multiple Terminal Nucleotidyl Transferases in the 3’ Tailing of Small RNAs in Arabidopsis
Source: PubMed Central journal article supplement (PMC4415790; doi:10.1371/journal.pgen.1005091), 2015-04-30
Supplement: pgen.1005091.s009.pdf [file pgen.1005091.s009.pdf]

S3 Table

|           | PAP | PAP associated | Linker region and P-motif |
|-----------|-----|----------------|---------------------------|
| HESO1     | YES | YES            | YES                       |
| URT1      | YES | YES            | YES                       |
| At3g56320 | YES | YES            | NO                        |
| At5g53770 | YES | YES            | NO                        |
| At3g51620 | YES | YES            | NO                        |
| At2g40520 | YES | YES            | NO                        |
| At4g00060 | YES | YES            | NO                        |
| At3g45750 | YES | NO             | YES                       |
| At3g45760 | YES | NO             | YES                       |
| At3g61690 | YES | NO             | NO                        |
